# Supplementary material for: Genetic characterization of northeastern Italian population isolates in the context of broader European genetic diversity
Source: PubMed Central journal article supplement — Eur J Hum Genet. 2012 Dec 19;21(6):659–65. doi: 10.1038/ejhg.2012.229 (PMC3658181; doi:10.1038/ejhg.2012.229), 2012-12-19
Supplement: ejhg2012229x5.pdf [file ejhg2012229x5.pdf]

Color Key

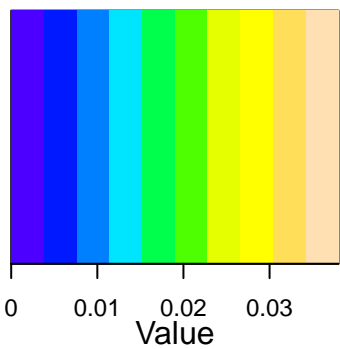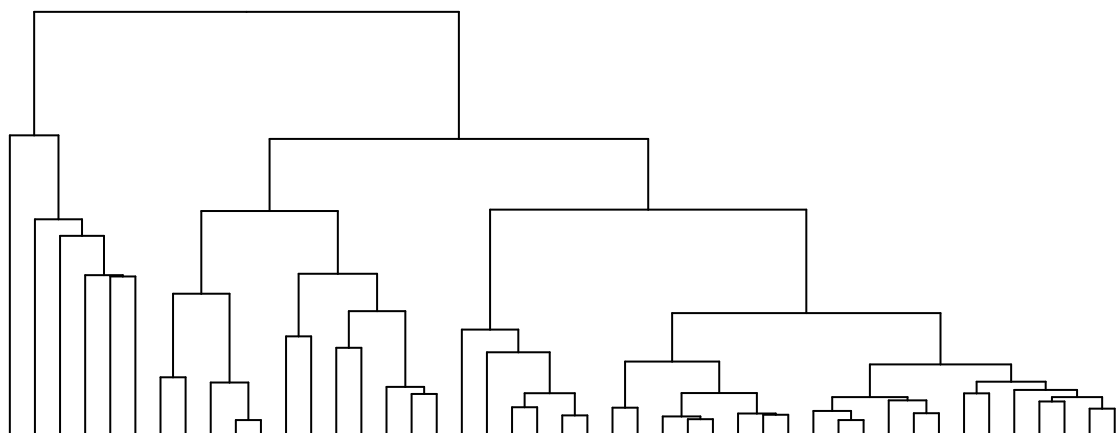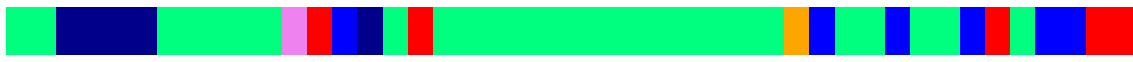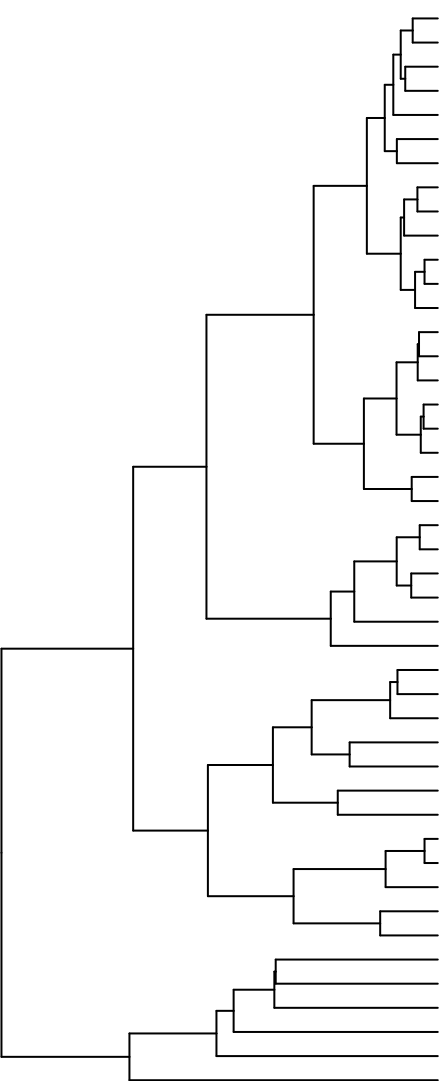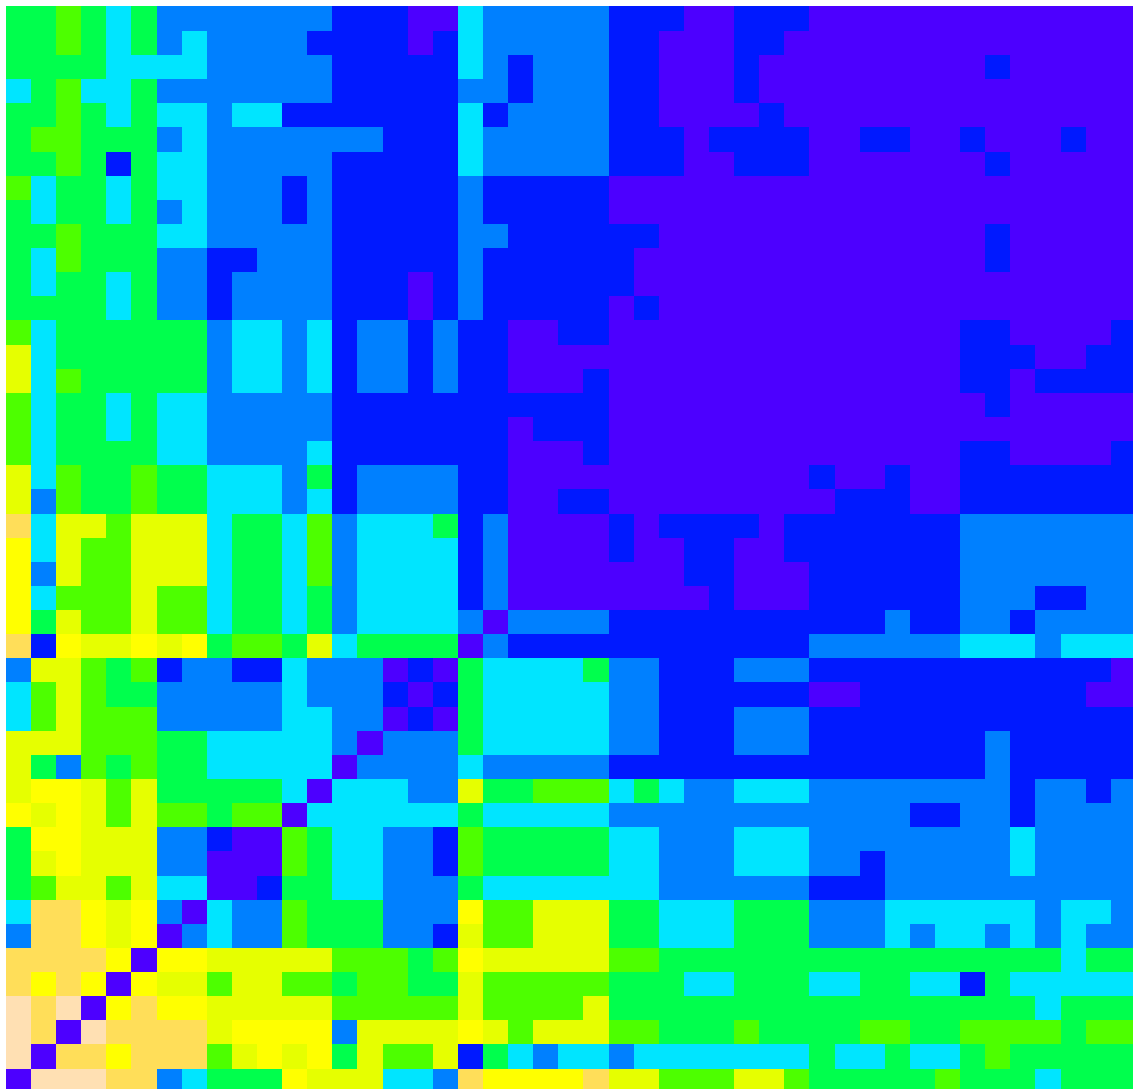

- Bedouins
- Finns.I.
- Resia.I.
- Sauris.I.
- Erto.I.
- Illegio.I.
- Palestinians
- Druzes
- Adygeis
- Abkhasians
- Georgians
- Basques
- Sardinians
- Resia.G.
- Clauzetto.I.
- Ashkenazy
- Carlantino
- Shepardic
- Finns.G.
- Orcadians
- Russians
- Estonians
- Lithuanians
- Latvians
- Swedes
- Poles
- Hungarians
- Austrians
- Germans.S.
- Germans.N.
- Czechs
- Slovenians
- Clauzetto.G.
- Bulgarians
- Romanians
- SMC
- Swiss
- French
- Erto.G.
- Borbera
- Spaniards
- Sauris.G.
- Illegio.G.
- Italians.N.
- Tuscans

- Tuscans
- Italians.N.
- Illegio.G.
- Sauris.G.
- Spaniards
- Borbera
- Erto.G.
- French
- Swiss
- SMC
- Romanians
- Bulgarians
- Clauzetto.G.
- Slovenians
- Czechs
- Germans.N.
- Germans.S.
- Austrians
- Hungarians
- Poles
- Swedes
- Latvians
- Lithuanians
- Estonians
- Russians
- Orcadians
- Finns.G.
- Shepardic
- Carlantino
- Ashkenazy
- Clauzetto.I.
- Resia.G.
- Sardinians
- Basques
- Georgians
- Abkhasians
- Adygeis
- Druzes
- Palestinians
- Illegio.I.
- Erto.I.
- Sauris.I.
- Resia.I.
- Finns.I.
- Bedouins
