# Supplementary figures and images for: Genetic characterization of northeastern Italian population isolates in the context of broader European genetic diversity
Source: PubMed Central journal article supplement — Eur J Hum Genet. 2012 Dec 19;21(6):659–65. doi: 10.1038/ejhg.2012.229 (PMC3658181; doi:10.1038/ejhg.2012.229), 2012-12-19

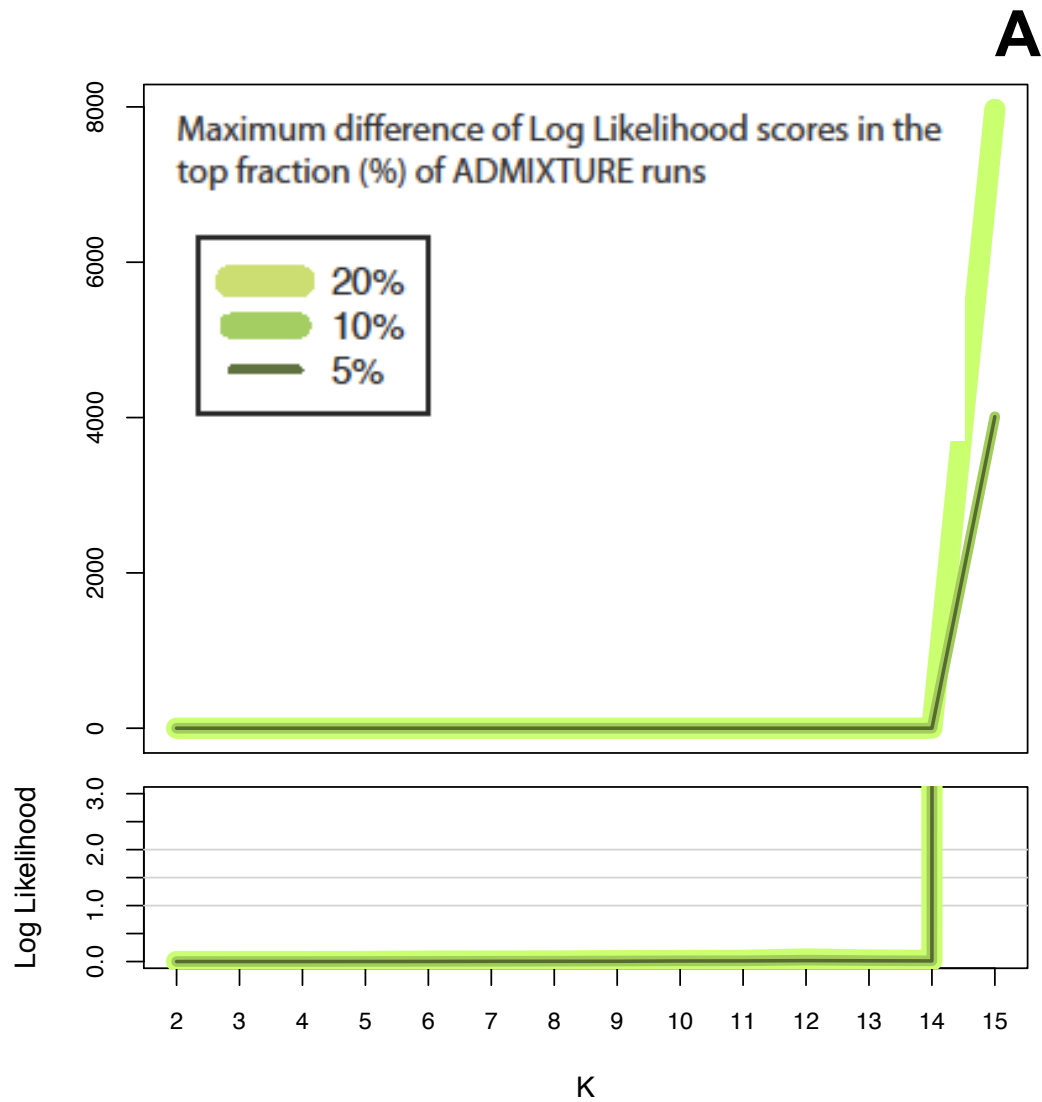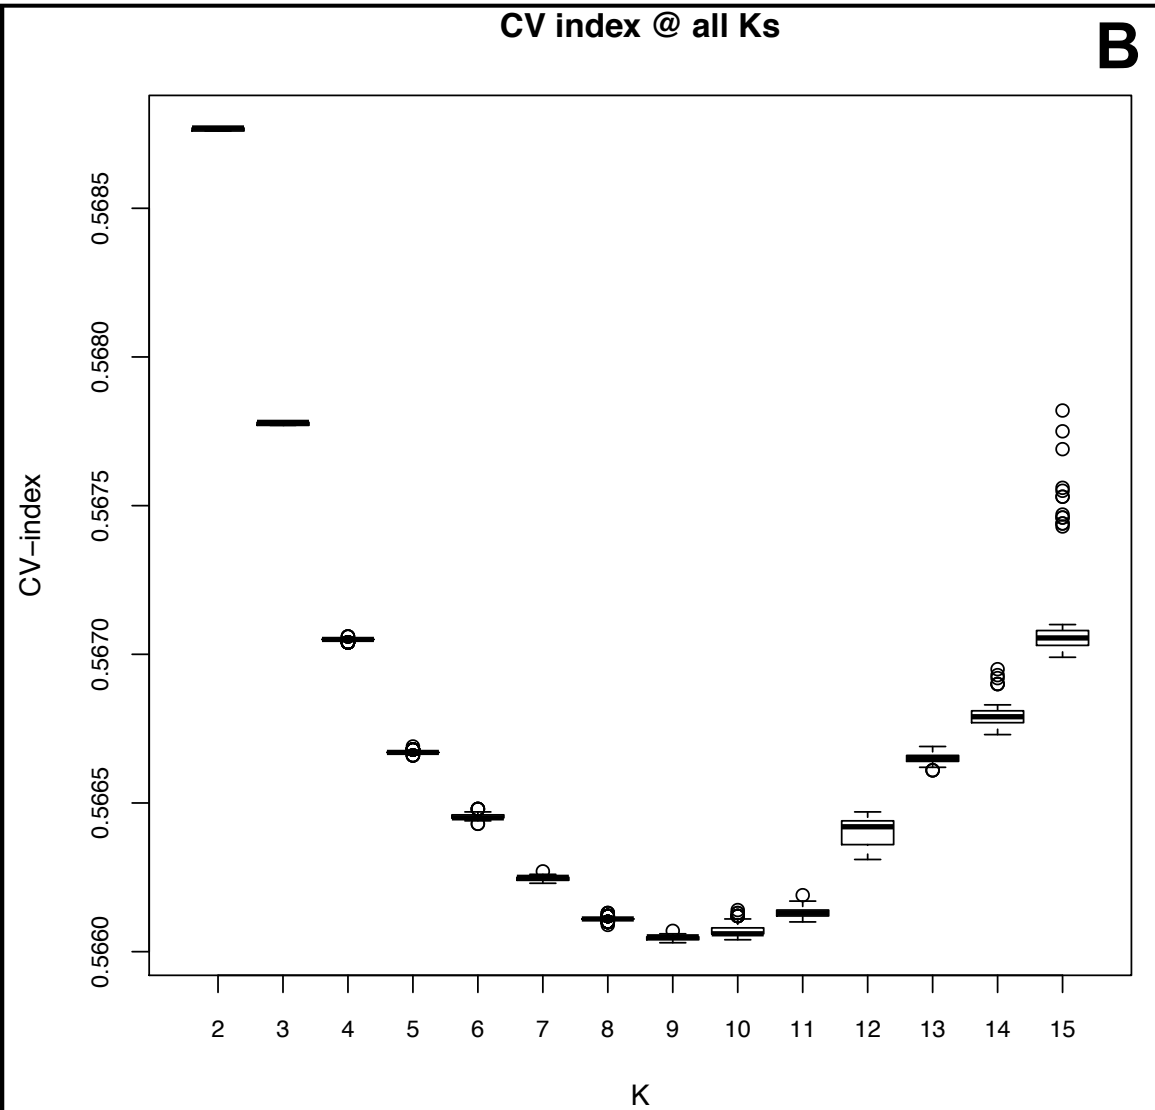

Supplement: ejhg2012229x2.pdf [file ejhg2012229x2.pdf]

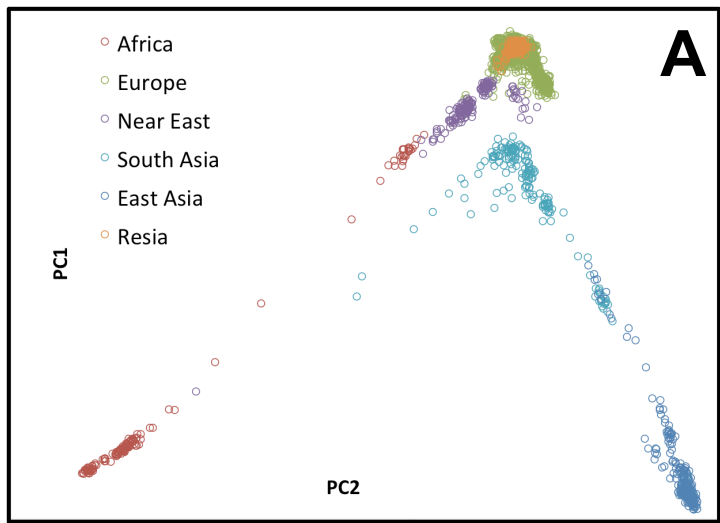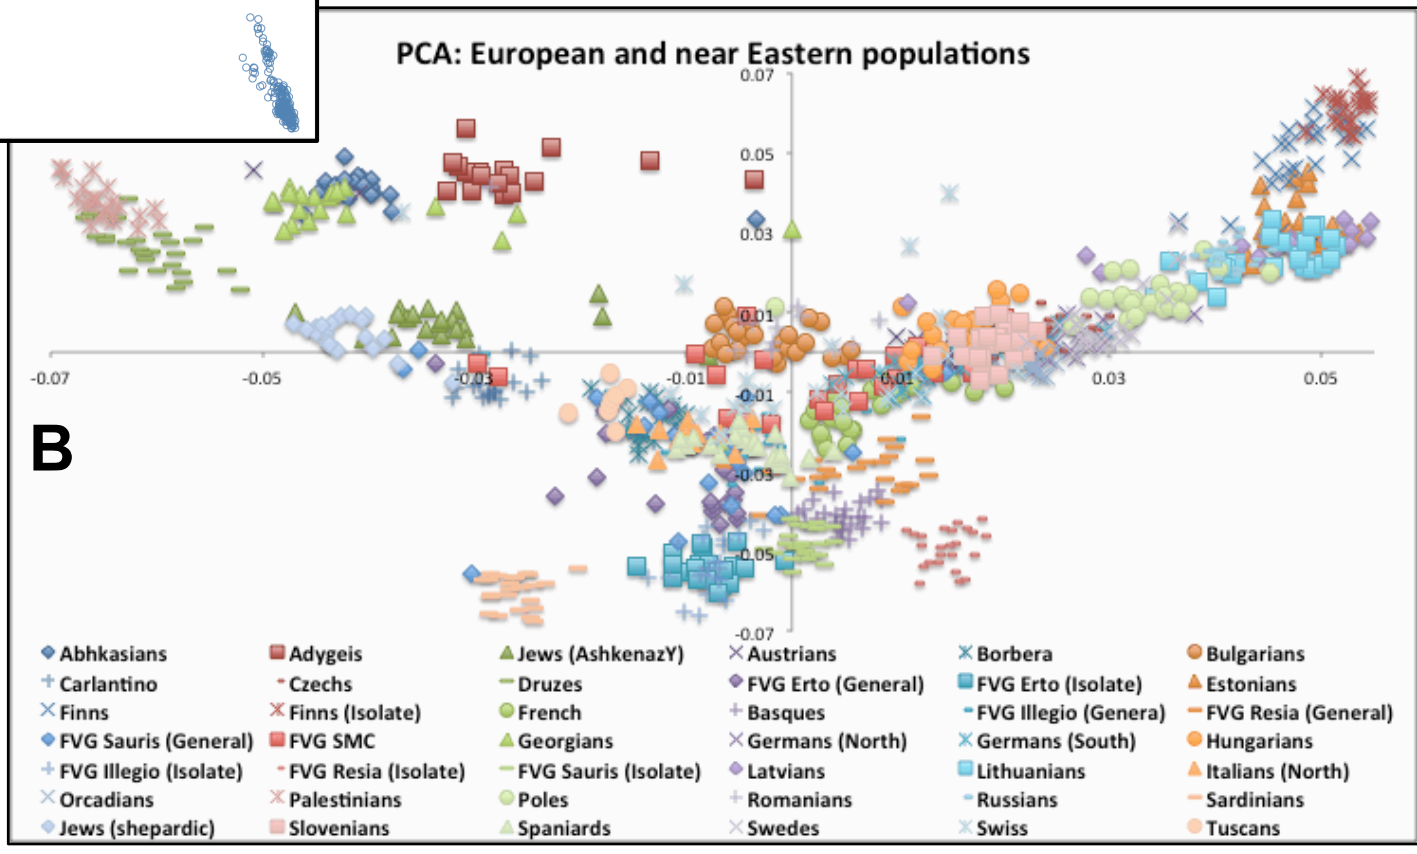

Supplement: ejhg2012229x3.pdf [file ejhg2012229x3.pdf]

**K10**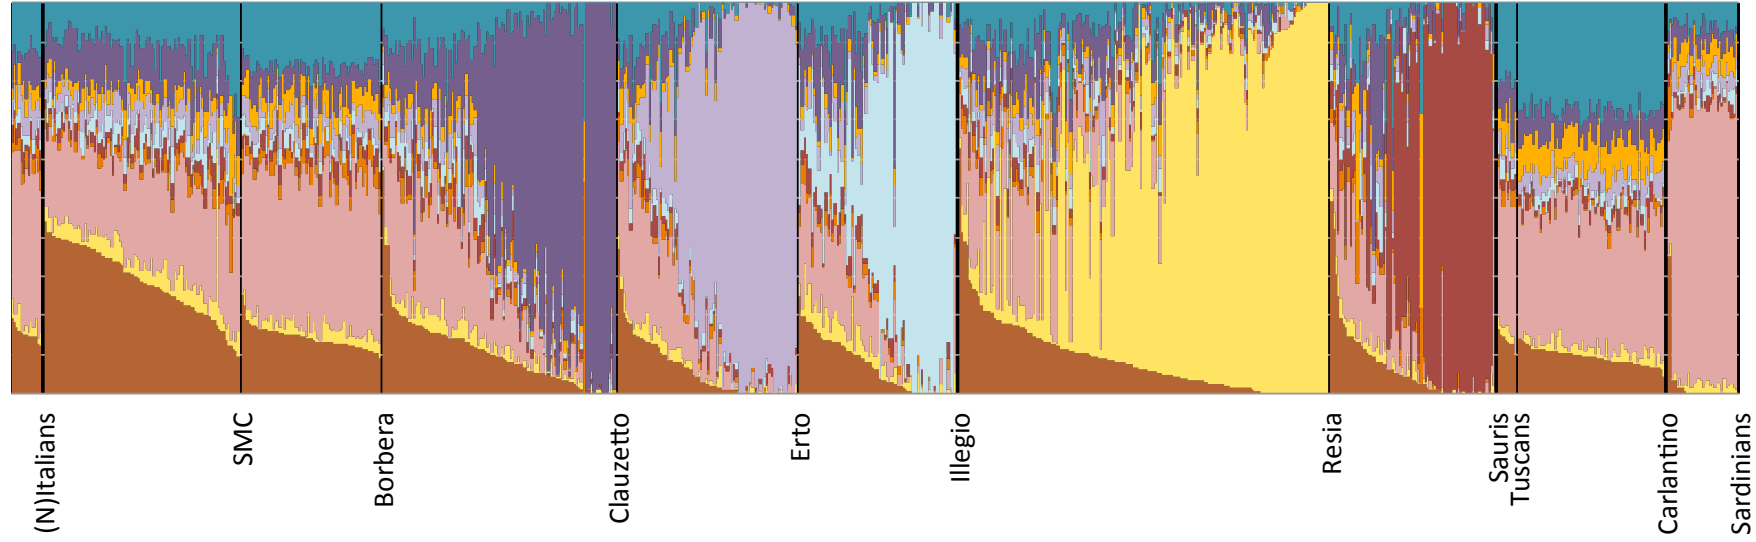**A**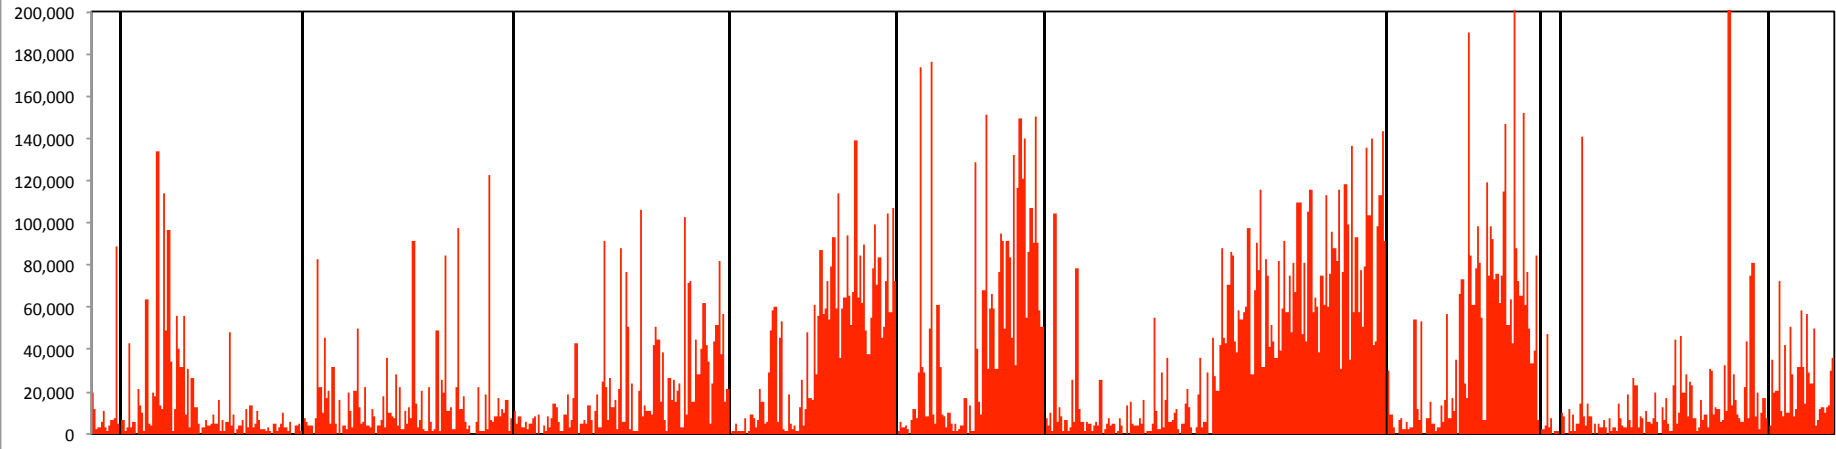**B****gROH (kb)**

Supplement: ejhg2012229x8.pdf [file ejhg2012229x8.pdf]
